# Supplementary material
Source: MDPI journal article supplement (https://www.mdpi.com/2504-477X/7/1/39)
Supplement: s1 [file s1]

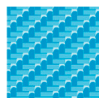

# Supplementary Material: Nanocomposites of Terbium Sulfide Nanoparticles with a Chitosan Capping Agent for Antibacterial Applications

Eny Kusrini <sup>1,\*</sup>, Alya Irma Safira <sup>1</sup>, Anwar Usman <sup>2</sup>, Eko Adi Prasetyanto <sup>3</sup>, Khoirina Dwi Nugrahaningtyas <sup>4</sup>, Sri Juari Santosa <sup>5</sup> and Lee D. Wilson <sup>6,\*</sup>

<sup>1</sup> Department of Chemical Engineering, Faculty of Engineering, Universitas Indonesia, Kampus Baru UI Depok, 16424, Indonesia; eny.k@ui.ac.id (E.K.); alyairmasafiraa@gmail.com

<sup>2</sup> Department of Chemistry, Faculty of Science, Universiti Brunei Darussalam, Jalan Tungku Link, Gadong, BE1410, Brunei; anwar.usman@ubd.edu.bn

<sup>3</sup> Faculty of Medical, Atma Jaya Catholic University of Indonesia, Jl. Pluit Raya No.2, Penjaringan, Jakarta 14440, Indonesia; prasetyanto@atmajaya.ac.id

<sup>4</sup> Department of Chemistry, Faculty of Mathematics and Natural Sciences, Sebelas Maret University, Jl. Ir Sutami No 36A, Surakarta 57126, Indonesia; khoirinadwi@staff.uns.ac.id

<sup>5</sup> Department of Chemistry, Faculty of Mathematics and Natural Sciences, Universitas Gadjah Mada, Sekip Utara P.O. Box BLS 21, Yogyakarta 55281, Indonesia; sjuari@ugm.ac.id

<sup>6</sup> Department of Chemistry, University of Saskatchewan 110 Science Place, Room 156 Thorvaldson Building, Saskatoon, SK S7N 5C9, Canada

\* Correspondence: eny.k@ui.ac.id (E.K.); lee.wilson@usask.ca (L.D.W.);

Tel.: +62-21-7863505 (E.K.); +1-306-966-2961 (L.D.W.); Fax: +62-21-7863506 (E.K.); +1-306-966-4730 (L.D.W.)

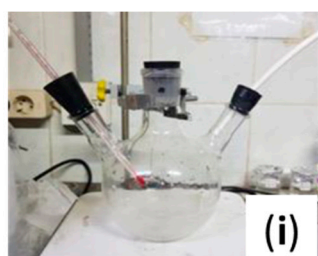

(i) The process of purging the chitosan solution for 30 minutes before adding the precursor  $\text{Tb}(\text{NO}_3)_3 \cdot 6\text{H}_2\text{O}$

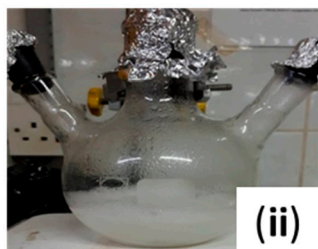

(ii) Stirring the solution for 2.5 hours after adding the precursor  $\text{Tb}(\text{NO}_3)_3 \cdot 6\text{H}_2\text{O}$

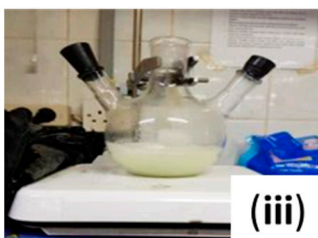

(iii) The color of the solution changed to yellowish white after adding sodium sulfide solution to the preparation of  $\text{Tb}_2\text{S}_3$  QDs with chitosan as a capping agent.

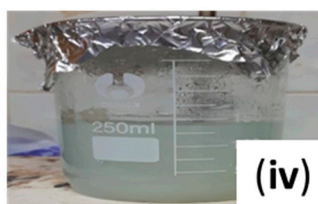

(iv) Heating the solution after adding ammonium hydroxide ( $\text{NH}_4\text{OH}$ ) to the preparation of  $\text{Tb}_2\text{S}_3$  with chitosan as a capping agent.

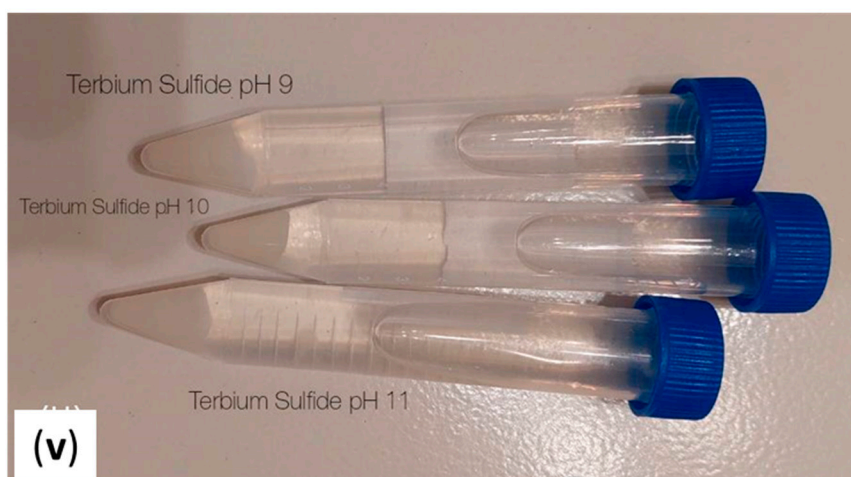

**Figure S1.** The process for preparing CS- $\text{Tb}_2\text{S}_3$  QDs by the wet-chemical method (steps i – v); whereas step (v) represents storage of the purified CS- $\text{Tb}_2\text{S}_3$  nanoparticles in ultrapure water.

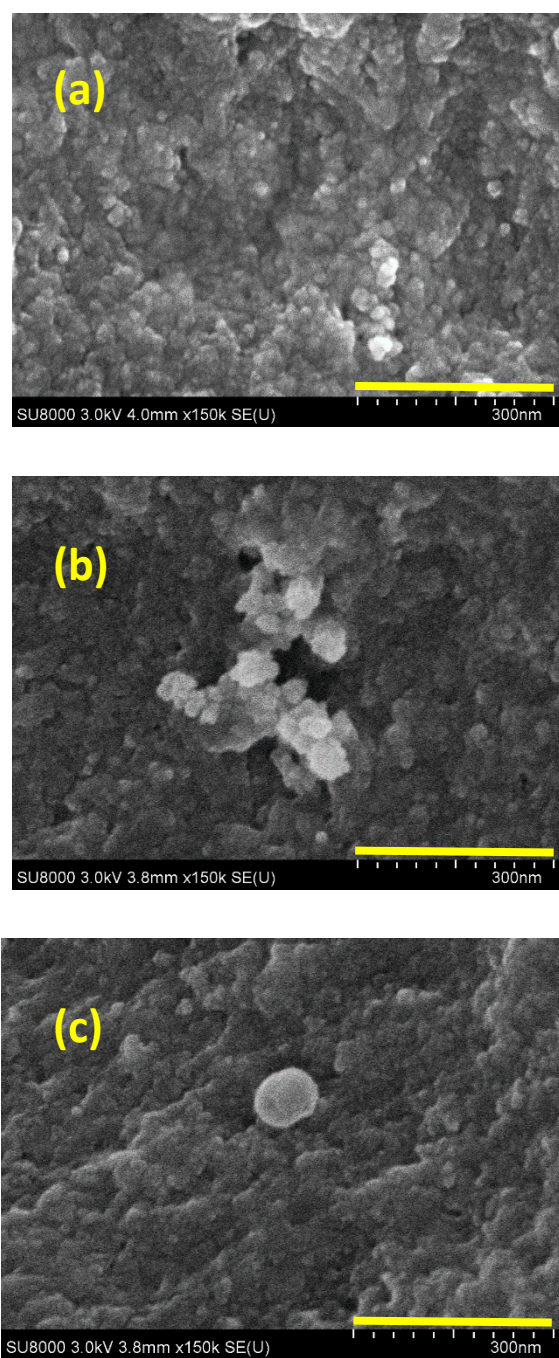

**Figure S2.** SEM images of different sample regions of the CS-Tb<sub>2</sub>S<sub>3</sub> nanocomposites prepared at pH 10: (a) region 1, (b) region 2, and (c) region 3. Scale bar (300 nm) and magnification (150k×) with chromium staining.

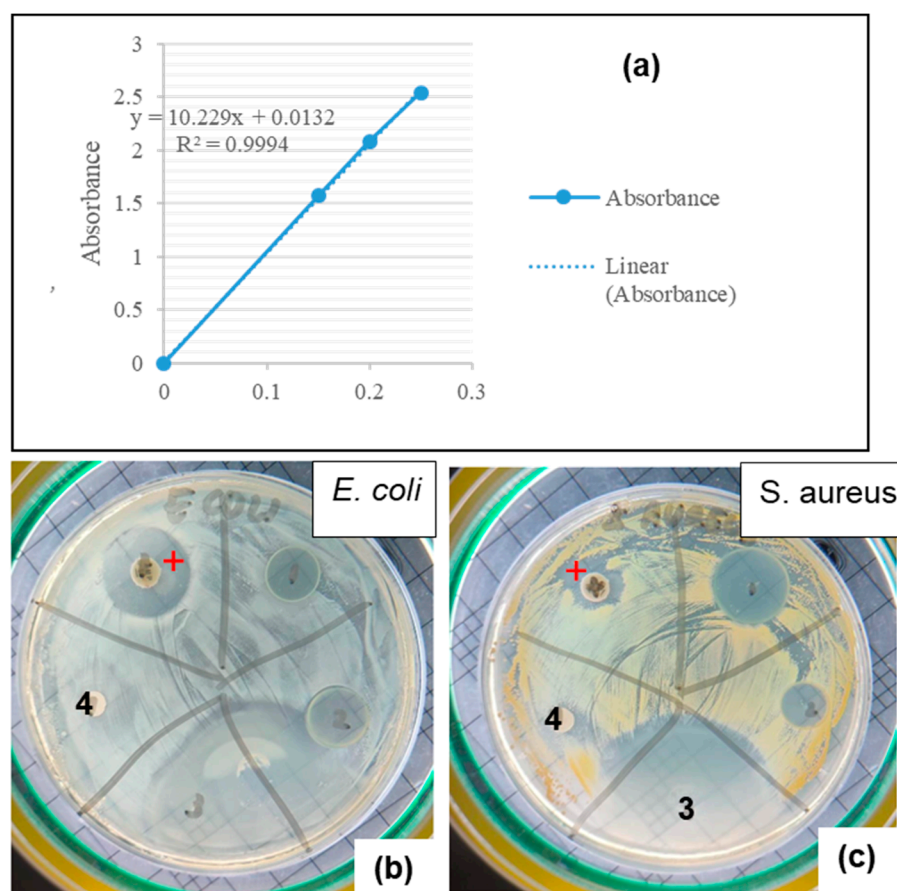

**Figure S3.** (a) Standard Curve of CS-Tb<sub>2</sub>S<sub>3</sub> QDs in Phosphate Buffer Solution (PBS), (b) Comparison antibacterial activity of europium nitrate salt (1), terbium nitrate salt (2), zinc nitrate salt (3), chitosan (4) and positive control (+; tetracycline) towards *E. coli*, and (c) Comparison antibacterial activity of europium nitrate salt (1), terbium nitrate salt (2), zinc nitrate salt (3), chitosan (4) and positive control (+; tetracycline) towards *S. aureus*.

XPS Results for Terbium Sulfide Nanocomposites

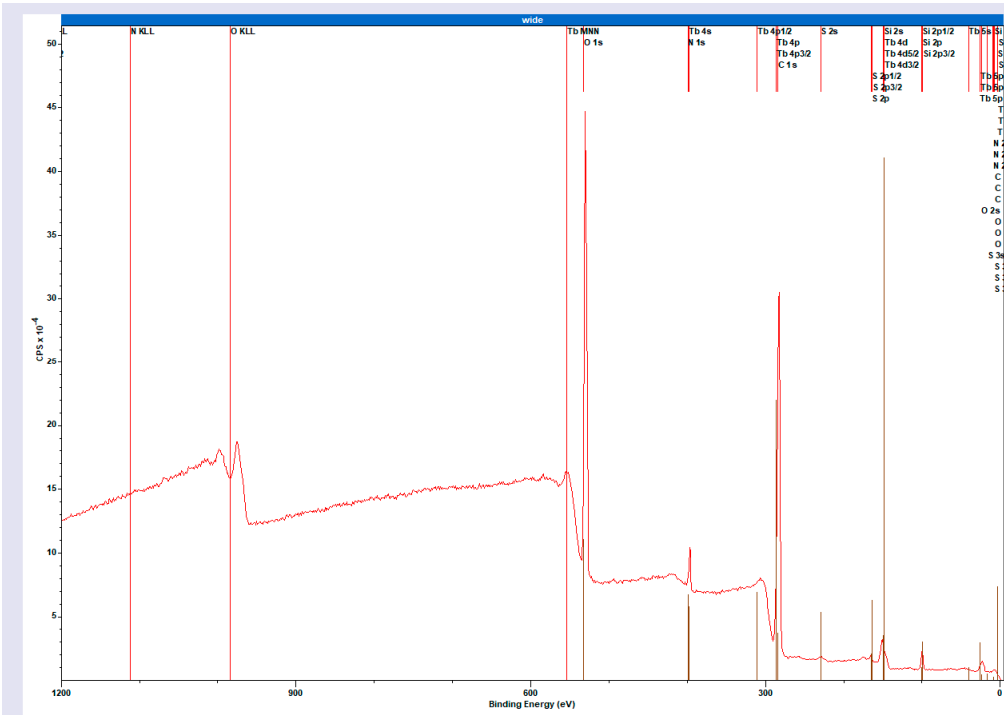

Figure S4. Wide scan and peak identification of Tb<sub>2</sub>S<sub>3</sub>-chitosan nanoparticles.

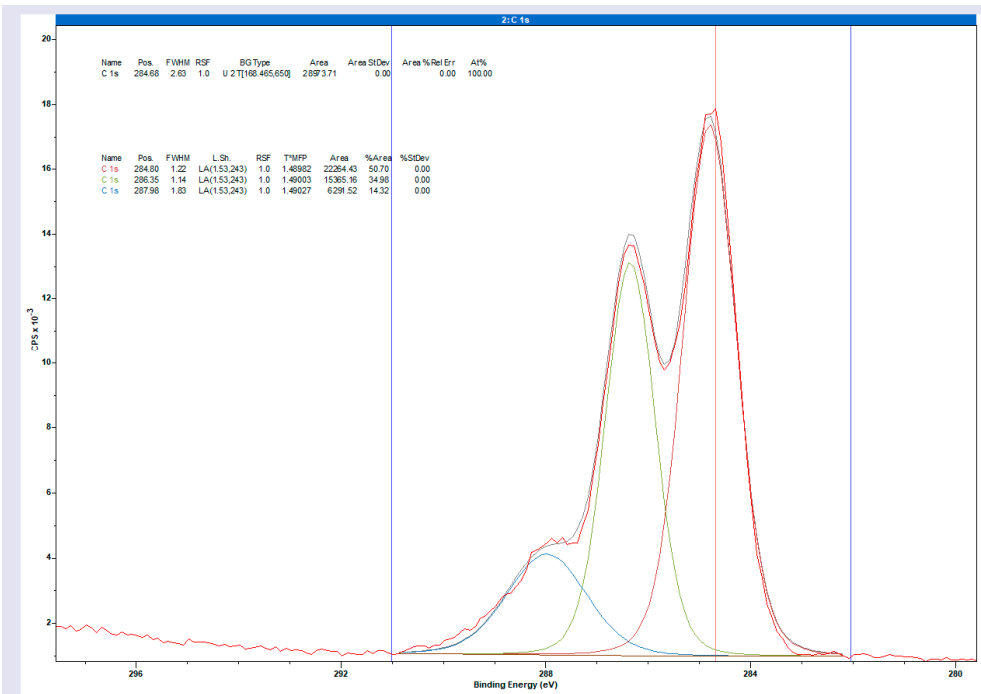

Figure S5. C 1s narrow scan of Tb<sub>2</sub>S<sub>3</sub>-chitosan nanoparticles.

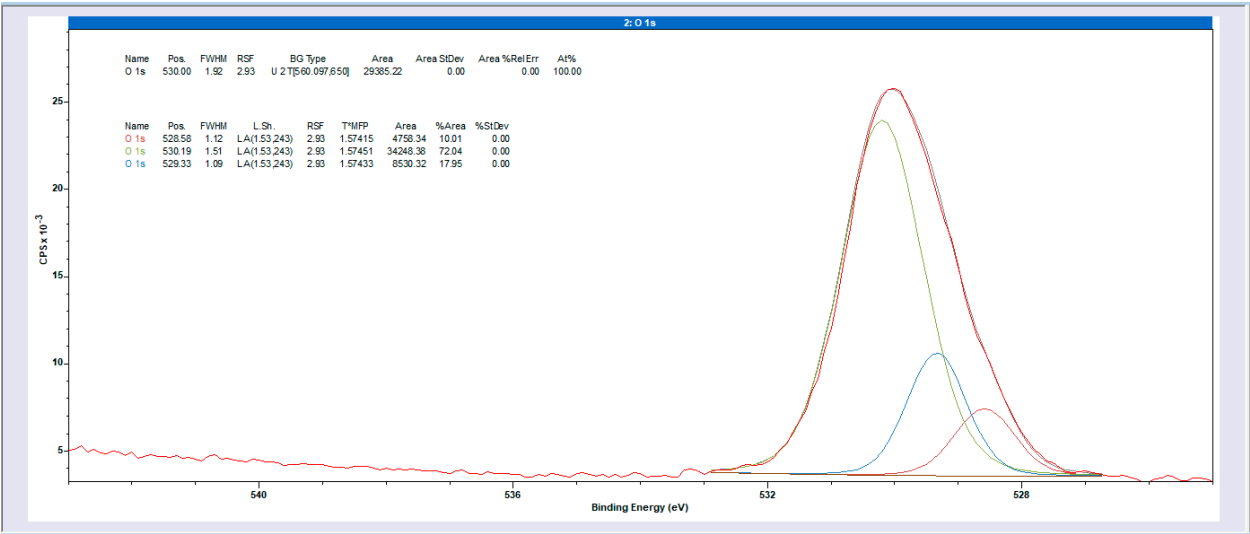

Figure S6. O 1s narrow scan of Tb<sub>2</sub>S<sub>3</sub>-chitosan nanoparticles.

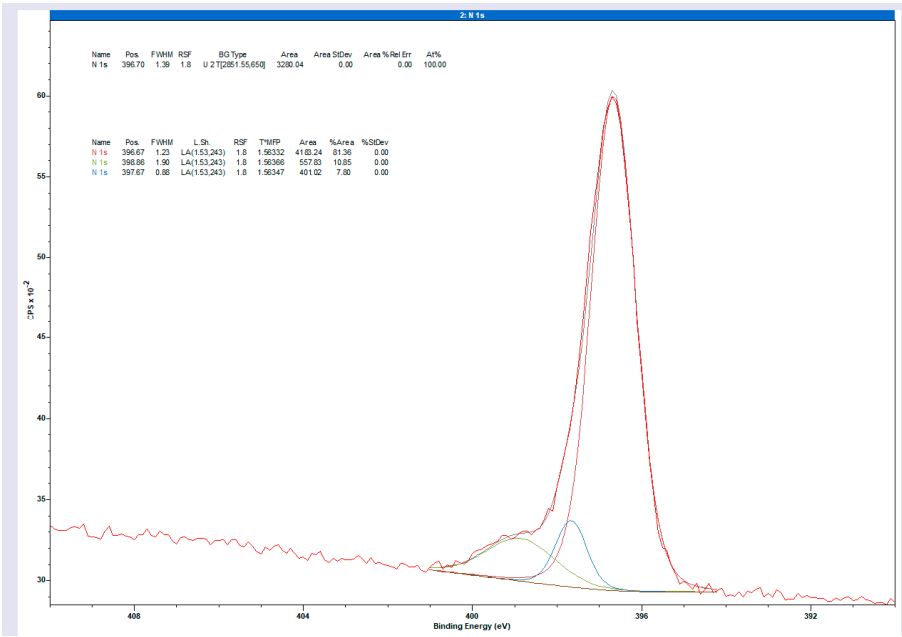

Figure S7. N 1s narrow scan of Tb<sub>2</sub>S<sub>3</sub>-chitosan nanoparticles.

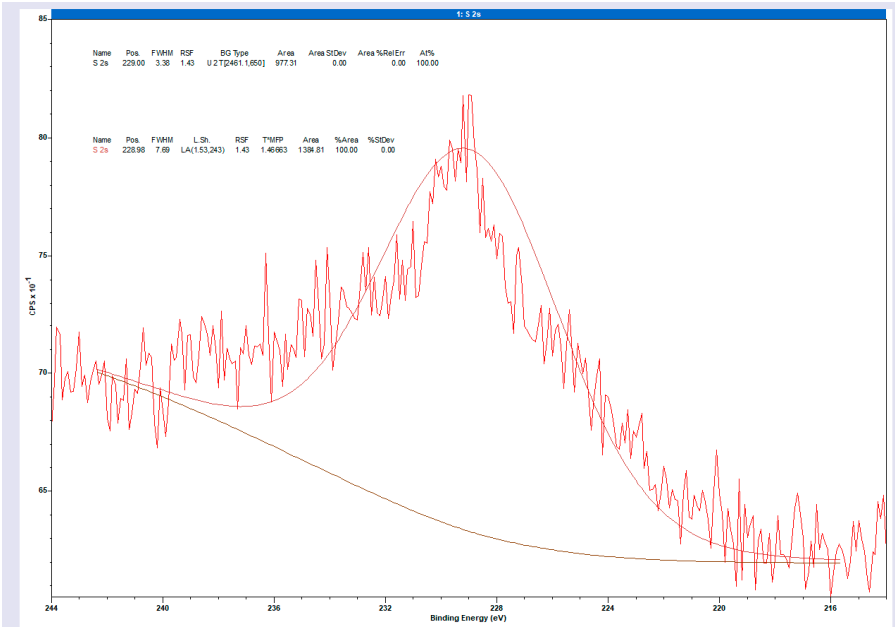

Figure S8. S 2s narrow scan of Tb<sub>2</sub>S<sub>3</sub>-chitosan nanoparticles.

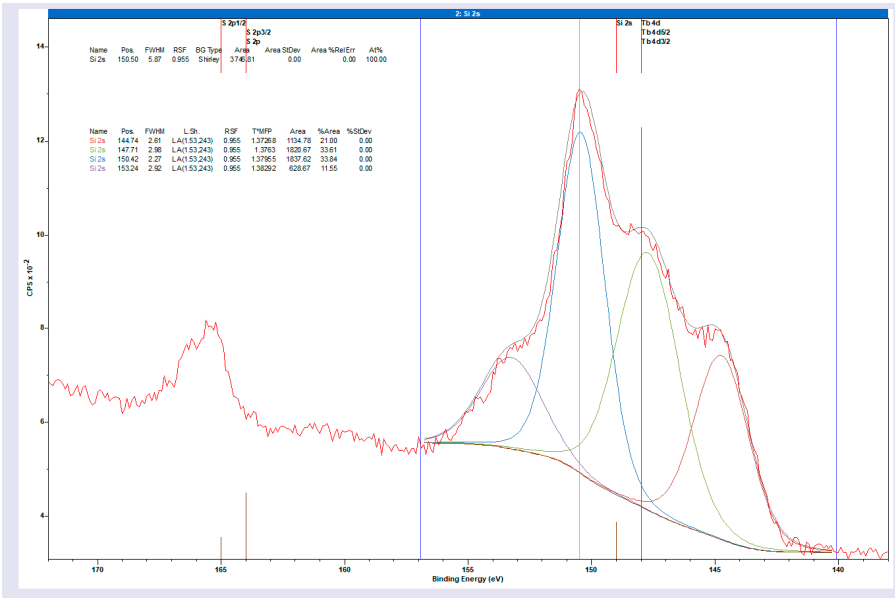

Figure S9. Si 2s narrow scan of Tb<sub>2</sub>S<sub>3</sub>-chitosan nanoparticles.



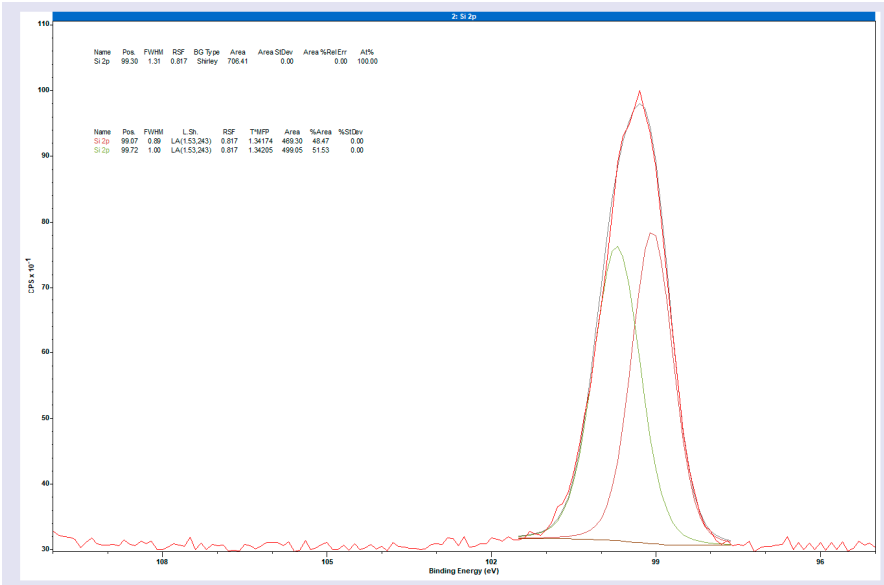

Figure S10. Si 2p narrow scan of Tb<sub>2</sub>S<sub>3</sub>-chitosan nanoparticles.

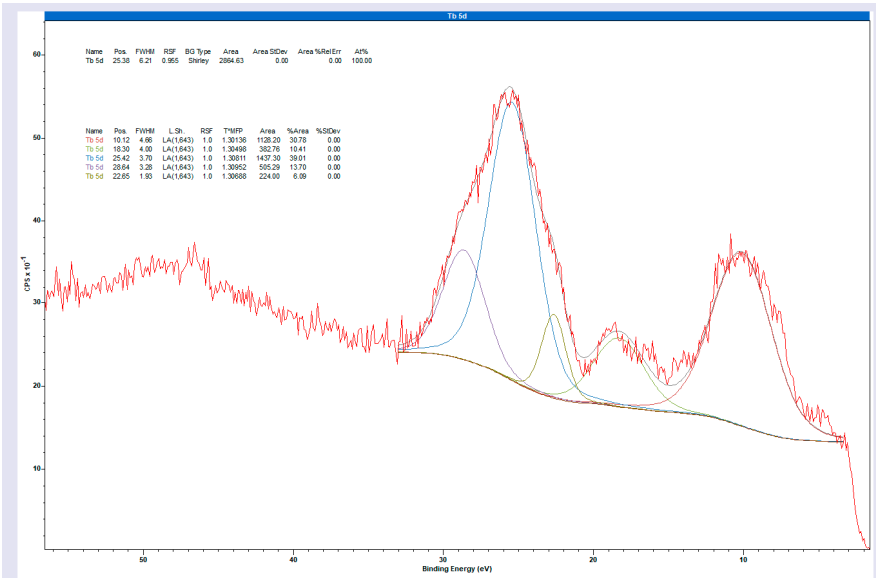

Figure S11. Tb 5d and Tb 4f narrow scan of Tb<sub>2</sub>S<sub>3</sub>-chitosan nanoparticles.



XPS Carbon Tape Results:

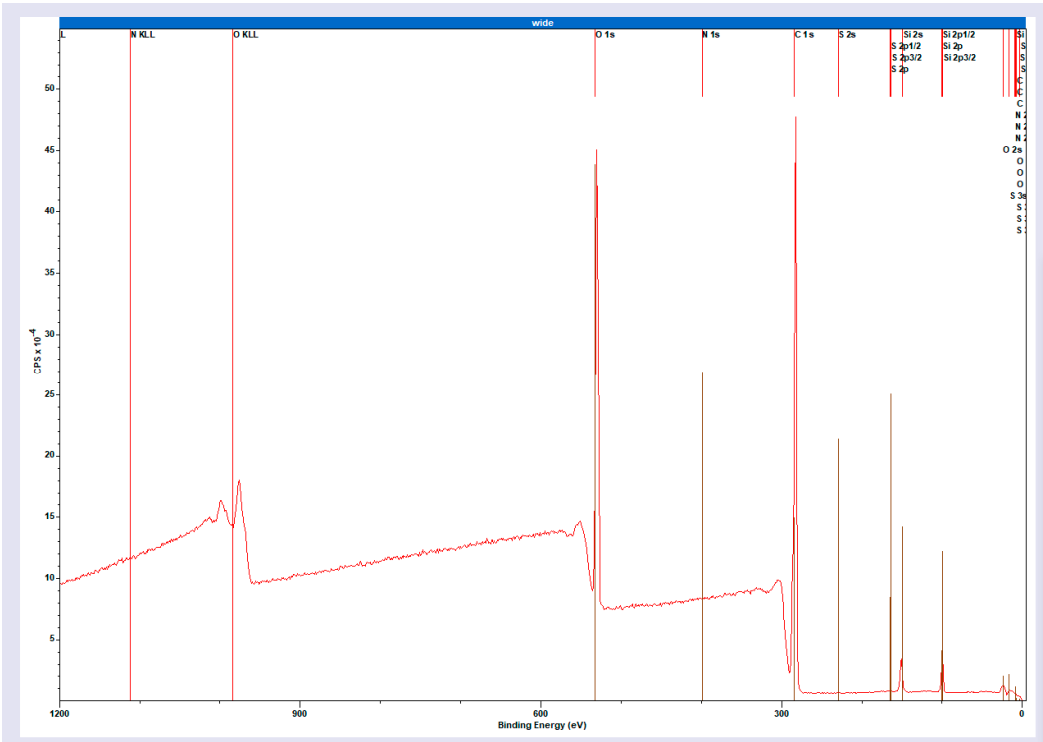

Figure S12. Wide scan of carbon tape.

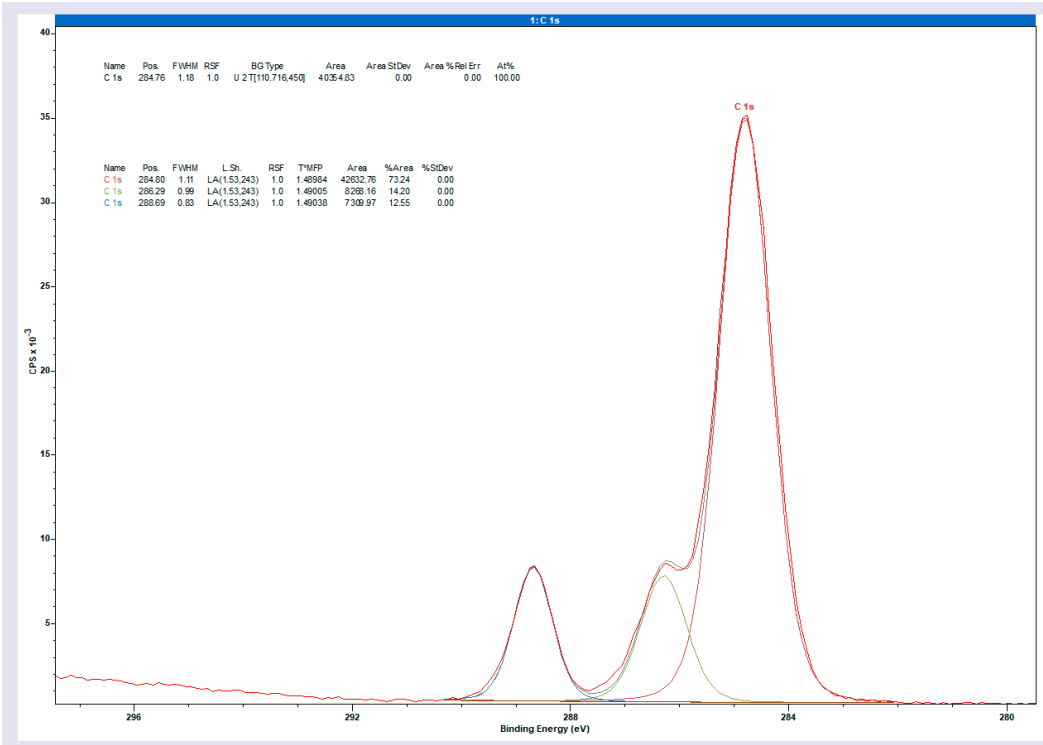

Figure S13. C 1s narrow scan of the carbon tape.

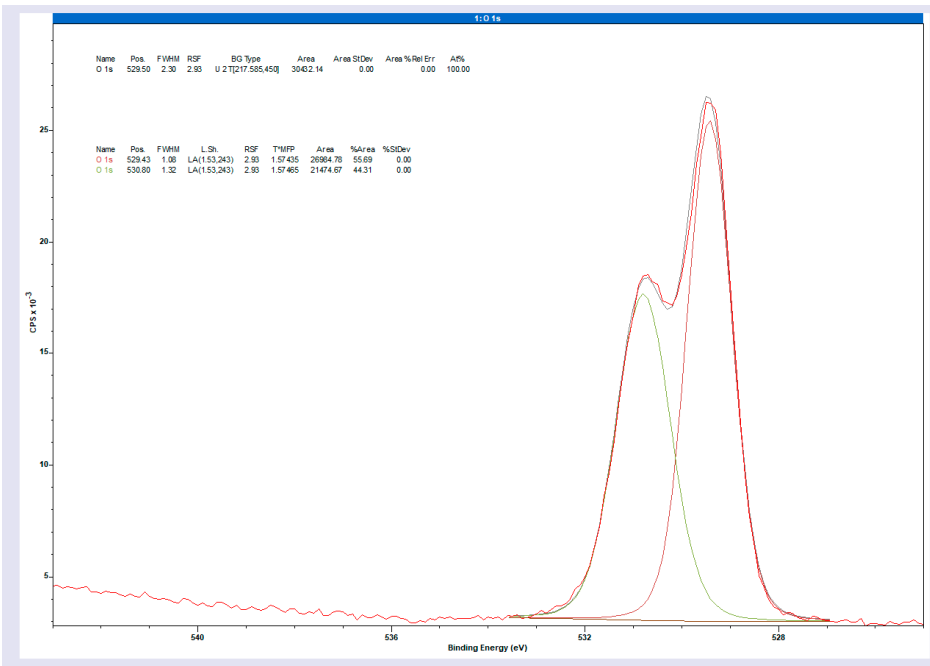

Figure S14. O 1s narrow scan of the carbon tape.

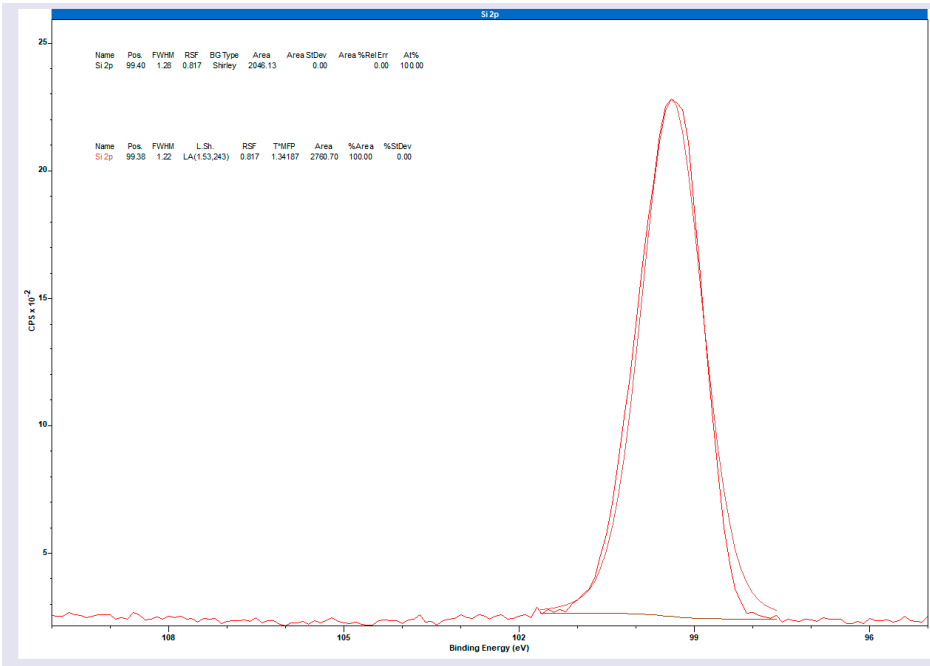

Figure S15. Si 2p narrow scan of the carbon tape.

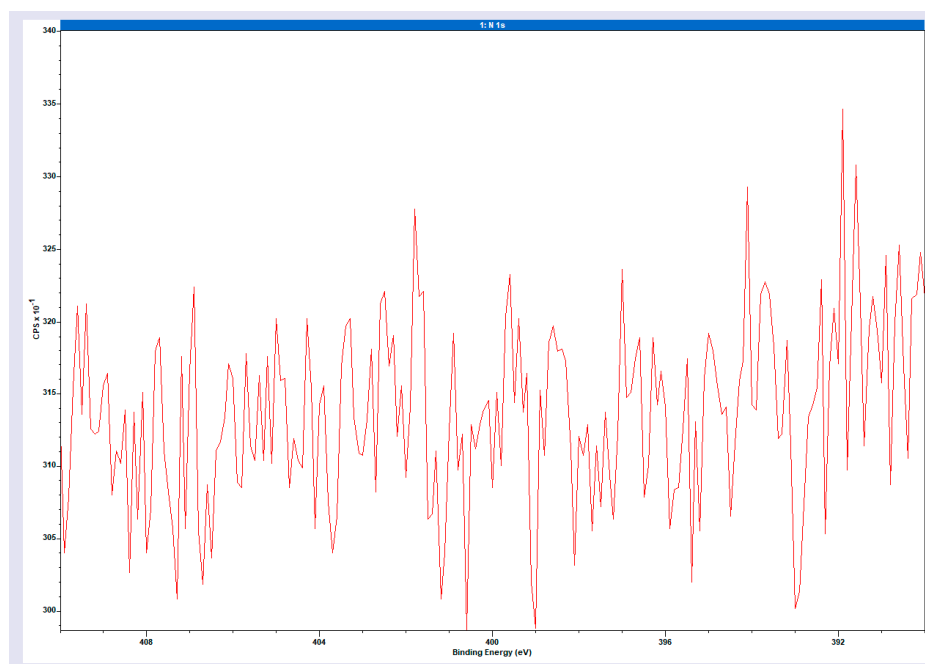

Figure S16. N 1s narrow scan of the carbon tape.

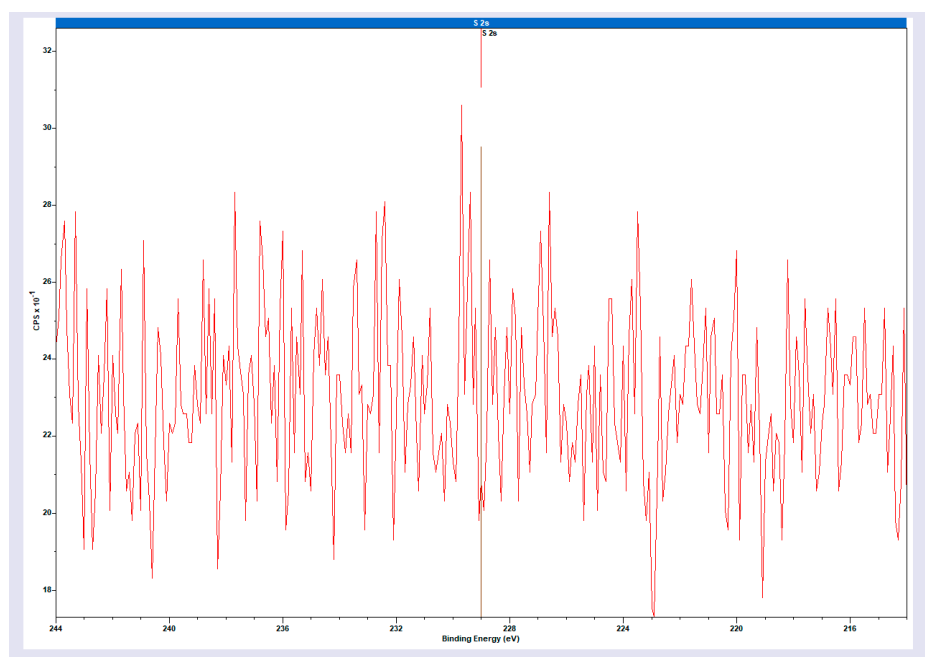

Figure S17. S 2s narrow scan of the carbon tape.

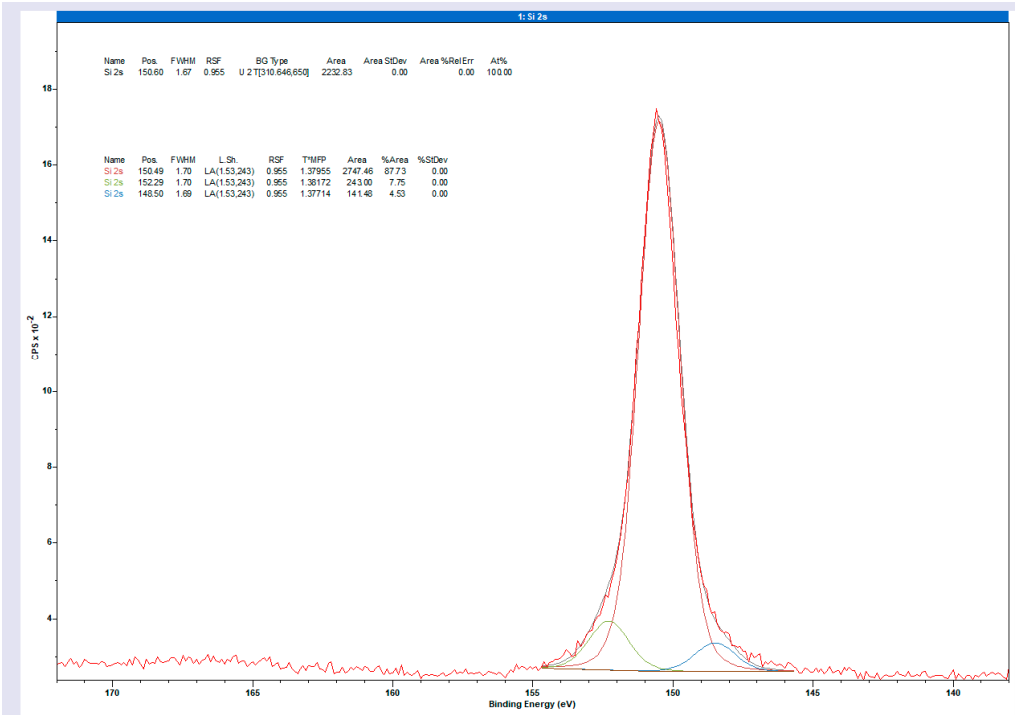

Figure S18. Si 2s narrow scan of the carbon tape.

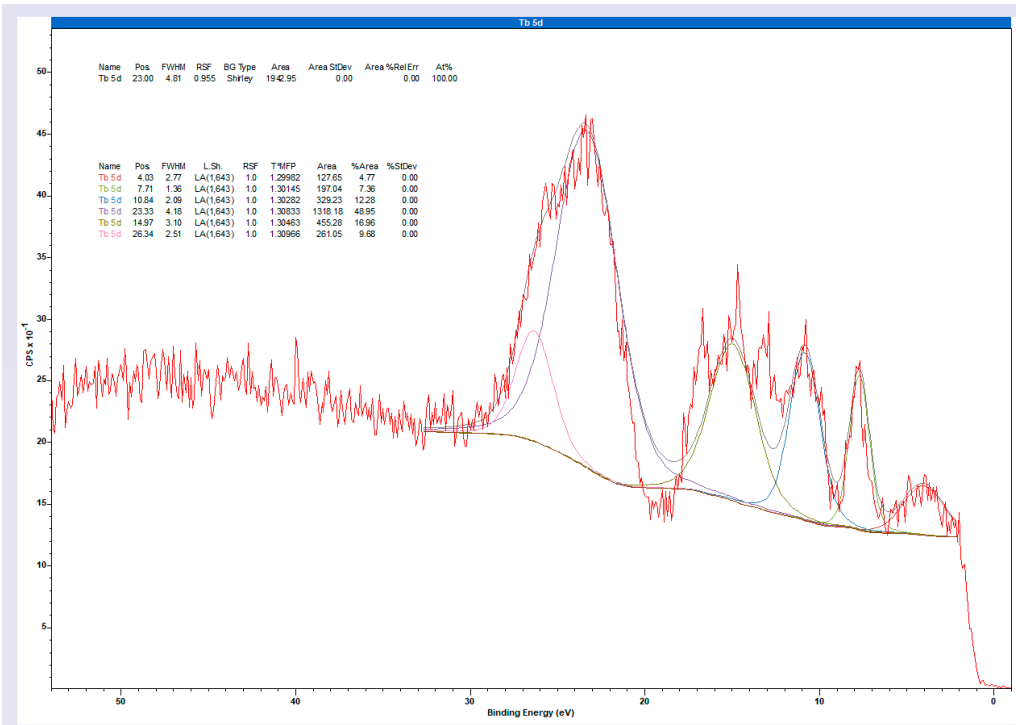

Figure S19. Tb 5d and Tb 4f narrow scan of the carbon tape.
